# Supplementary material for: Water-driven boost in the visible light photocatalytic performance of Cs2AgBiBr6 double perovskite nanocrystals
Source: Royal Society of Chemistry journal article supplement (doi:10.1039/d2ta03217a), 2022-01-01
Supplement: d2ta03217a1.pdf [file d2ta03217a1.pdf]

## Supplementary Information

### Water-Driven Boost of the Visible Light Photocatalytic Performance of $\text{Cs}_2\text{AgBiBr}_6$ Double Perovskite Nanocrystals

Qianqian Fan<sup>1,3,4</sup>, Siying Wei<sup>2,4</sup>, Jianzhong Ma<sup>1,3,4\*</sup>, Wenbo Zhang<sup>2,3,4</sup>, Lu Wen<sup>1,4</sup>

1. College of Bioresources Chemical and Materials Engineering, Shaanxi University of Science and Technology, Xi 'an, 710021.

2. College of Chemistry and Chemical Engineering, Shaanxi University of Science and Technology, Xi 'an, 710021.

3. Key Laboratory of Auxiliary Chemistry and Technology for Chemical Industry, Ministry of Education, Shaanxi University of Science and Technology, Xi'an, 710021.

4. Xi 'an Key Laboratory of Green Chemicals and Functional Materials, Shaanxi University of Science and Technology, Xi 'an, 710021.

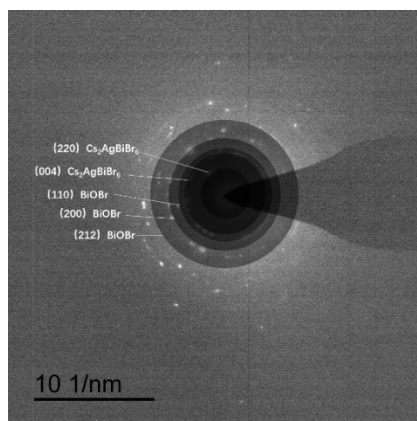

Figure S1. SAED pattern of water soaked  $\text{Cs}_2\text{AgBiBr}_6$  NCs.

---

Corresponding author:

E-mail address: majz@sust.edu.cn (Jianzhong Ma)

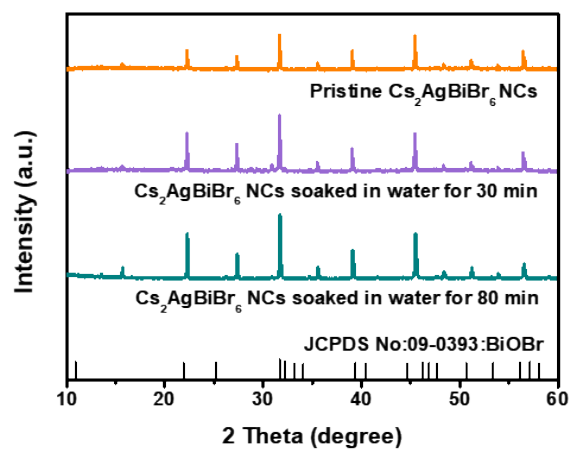

Figure S2. XRD patterns of Cs<sub>2</sub>AgBiBr<sub>6</sub> NCs soaked in water for 30 min and 80 min when the volume ratio of anhydrous ethanol to water was 10:0.

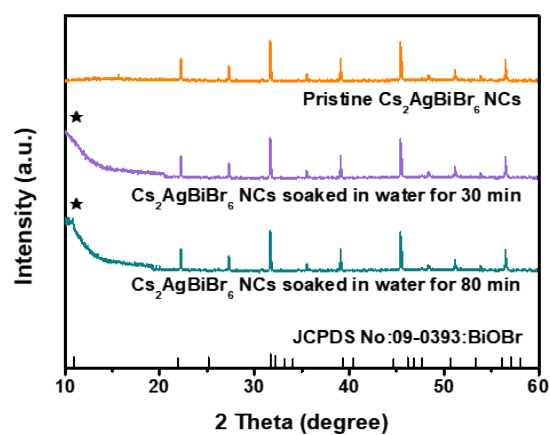

Figure S3. XRD patterns of Cs<sub>2</sub>AgBiBr<sub>6</sub> NCs soaked in water for 30 min and 80 min when the volume ratio of anhydrous ethanol to water was 8:2.

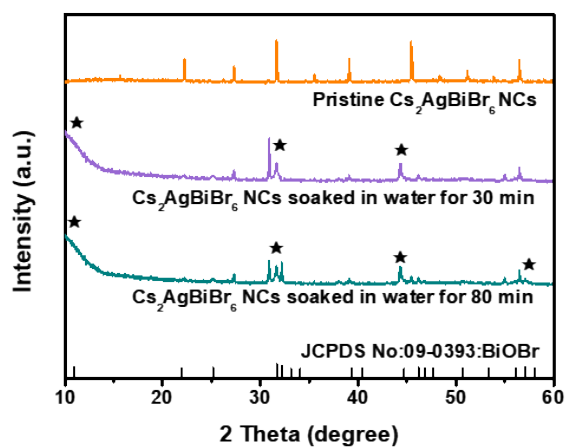

Figure S4. XRD patterns of Cs<sub>2</sub>AgBiBr<sub>6</sub> NCs soaked in water for 30 min and 80 min when the

volume ratio of anhydrous ethanol to water was 1:1.

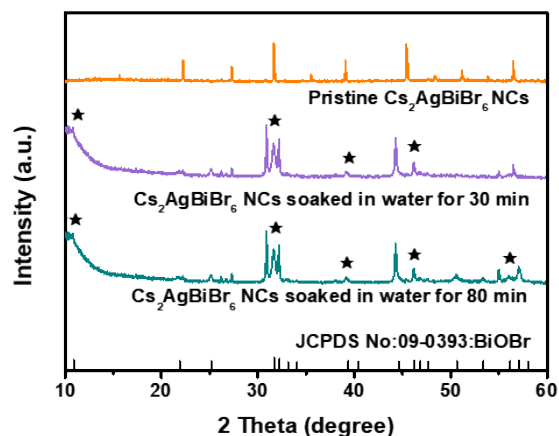

Figure S5. XRD patterns of Cs<sub>2</sub>AgBiBr<sub>6</sub> NCs soaked in water for 30 min and 80 min when the volume ratio of anhydrous ethanol to water was 2:8.

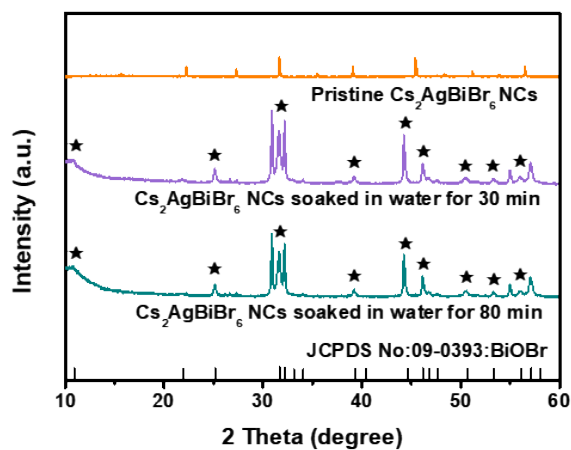

Figure S6. XRD patterns of Cs<sub>2</sub>AgBiBr<sub>6</sub> NCs soaked in water for 30 min and 80 min when the volume ratio of anhydrous ethanol to water was 0:10.

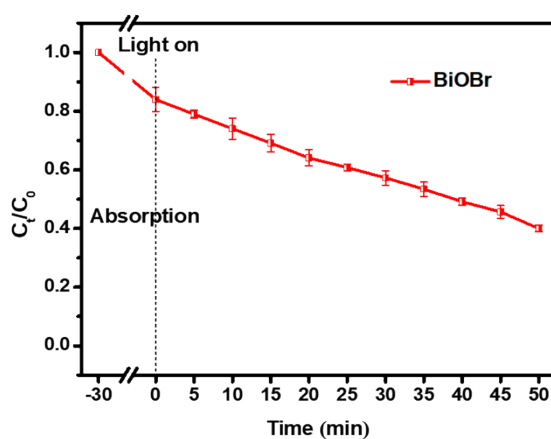

Figure S7. Plots of C<sub>t</sub>/C<sub>0</sub> versus the irradiation time for photocatalytic degradation of RhB by BiOBr.

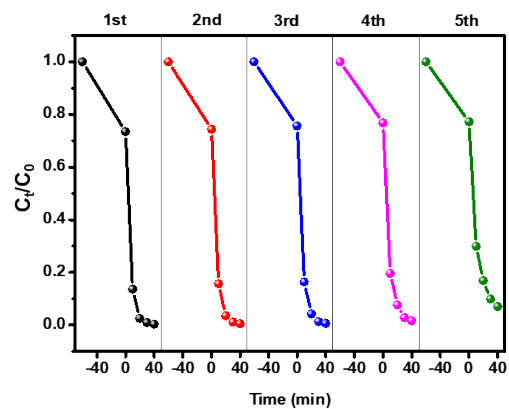

Figure S8. Stability tests of the  $\text{Cs}_2\text{AgBiBr}_6$  NCs in multiple photocatalytic degradation cycles.

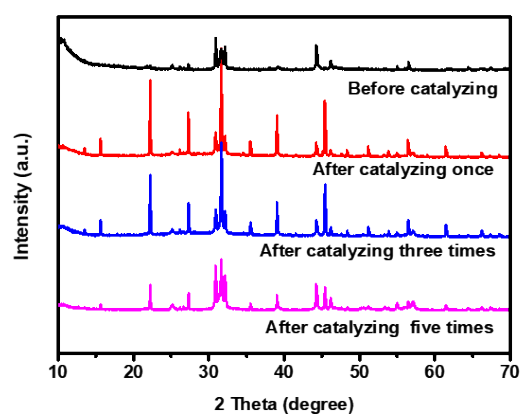

Figure S9. The XRD patterns of  $\text{Cs}_2\text{AgBiBr}_6$  NCs before and after the stability tests.
